# Supplementary material
Source: MDPI journal article supplement (https://www.mdpi.com/2673-9976/20/1/9)
Supplement: s1 [file s1]

# Design of enzyme stabilisation systems for gas separation: Novel studies on formulation of enzyme-based W/O emulsions to prepare emulsion-based supported liquid membranes for CO<sub>2</sub> capture

Suchintan Mondal<sup>a</sup>, Bhavna Alke<sup>a</sup>, Aline M. de Castro<sup>b</sup>, Paloma Ortiz-Albo<sup>a</sup>, Usman T. Syed<sup>a</sup>,  
João Crespo<sup>a</sup>, Carla Brazinha<sup>a</sup>

<sup>a</sup> LAQV/Requimte, Department of Chemistry, FCT NOVA, NOVA University of Lisbon, Portugal  
<sup>b</sup> PETROBRAS, Center of Research and Development, Rio de Janeiro, Brazil

## Background

- Global warming, majorly due to CO<sub>2</sub> emissions, is one of direst threat and a highly debated topic on this planet.
- Post-combustion carbon capture technology, including membrane-based separation and enzyme-based methods are widely studied within the scientific community.
- Membrane-based gas separation is an essential unit operation in chemical industries due to its simplicity, ease of operation, compact structure & reduced energy consumption [1].
- The separation efficiency of membranes strongly depend on the type of materials used for its preparation [2].
- Membrane emulsification has widely gained attention due to its inherent characteristic of being a mild and low energy intensive technique, suitable for sensitive enzymes [3].

## Membrane Emulsification

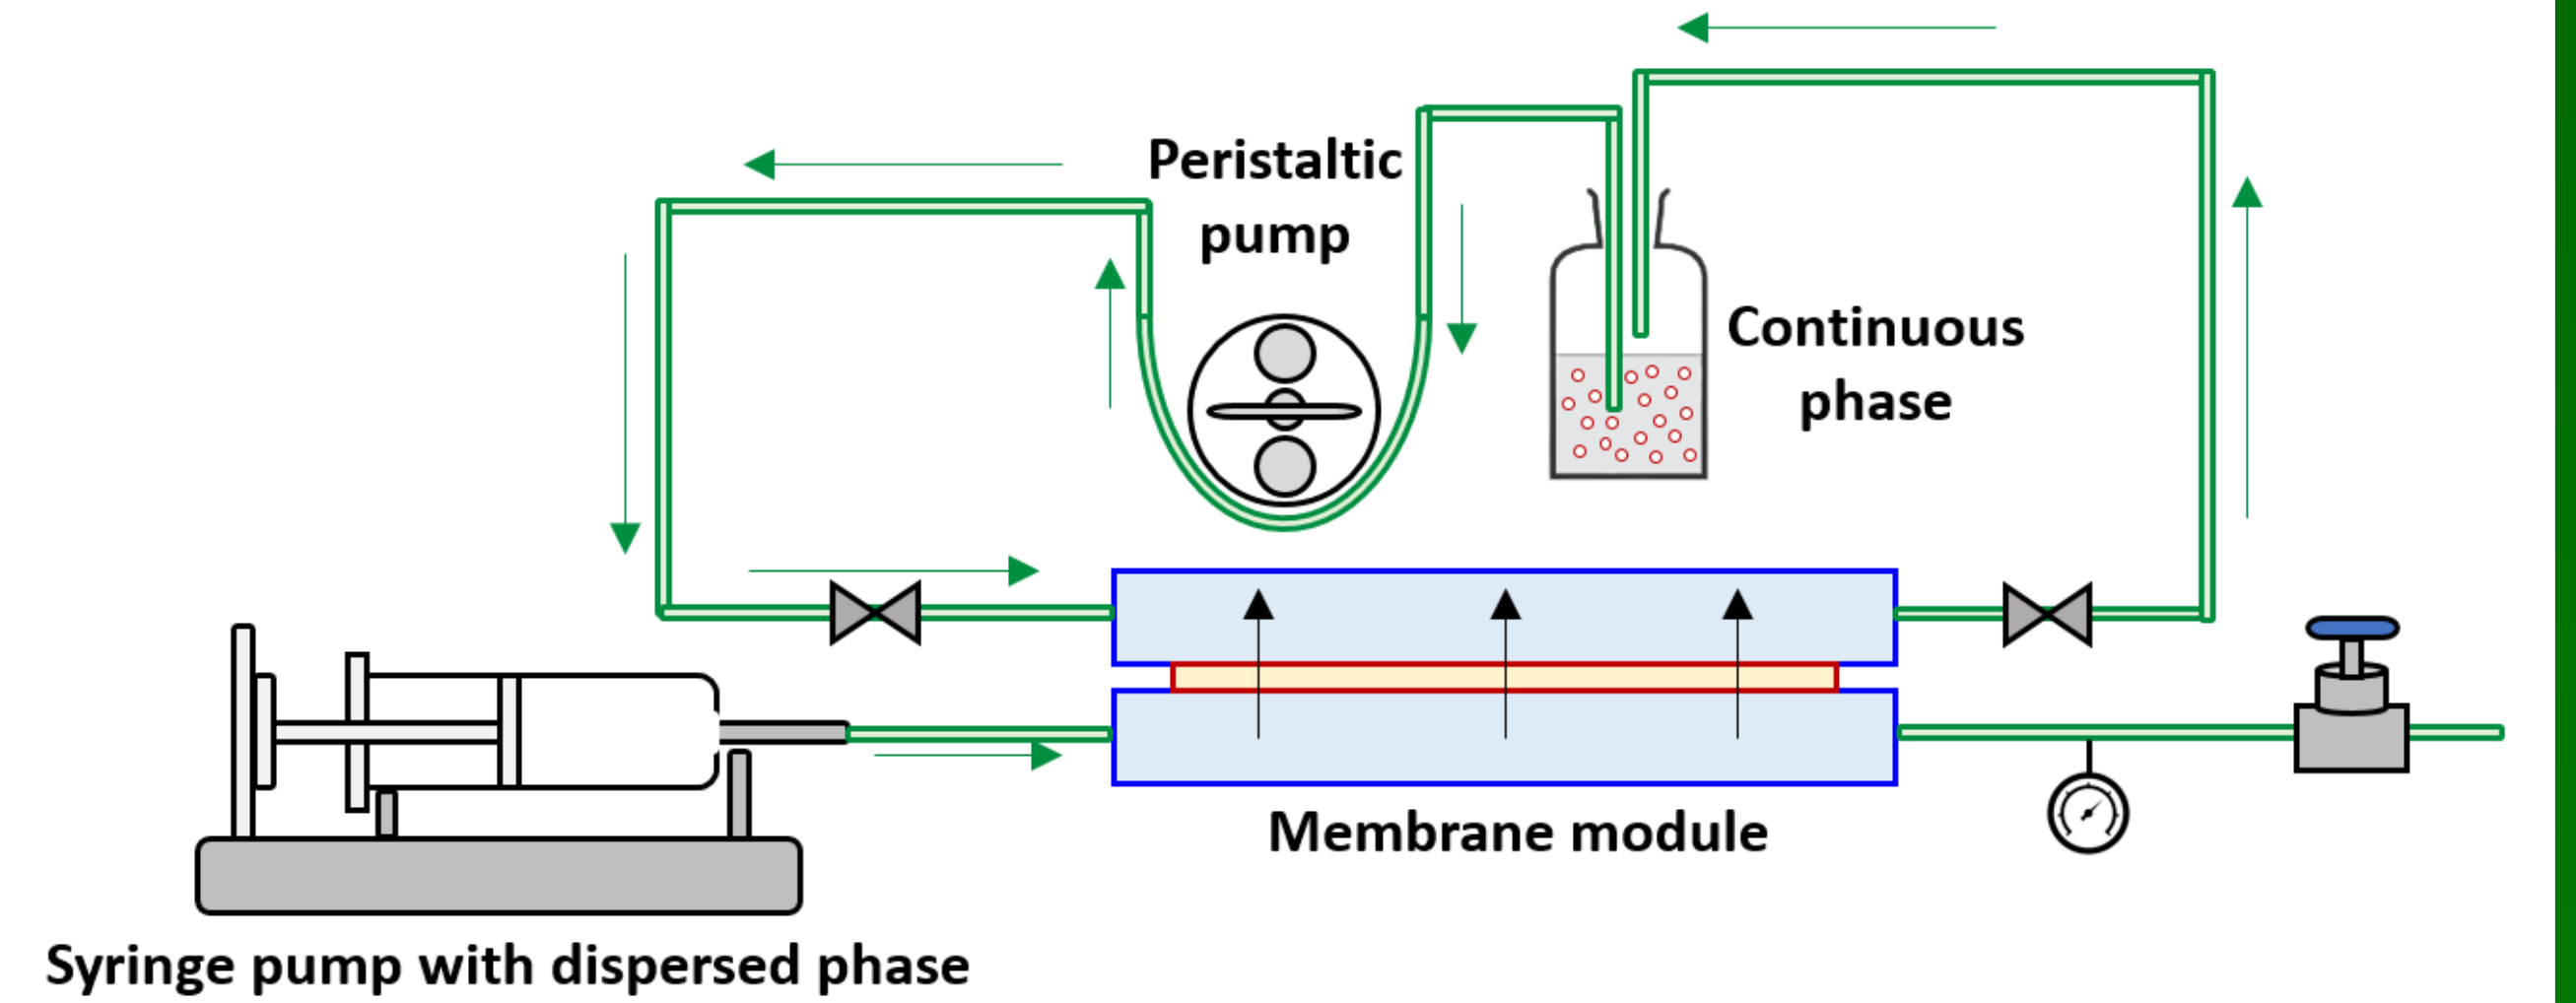

**Dispersed phase:** 0.5 g.L<sup>-1</sup> carbonic anhydrase enzyme with 5 % PEG 300 (w/w) in aqueous solution  
**Continuous phase:** 2 % Tween 80 (w/w) in corn oil

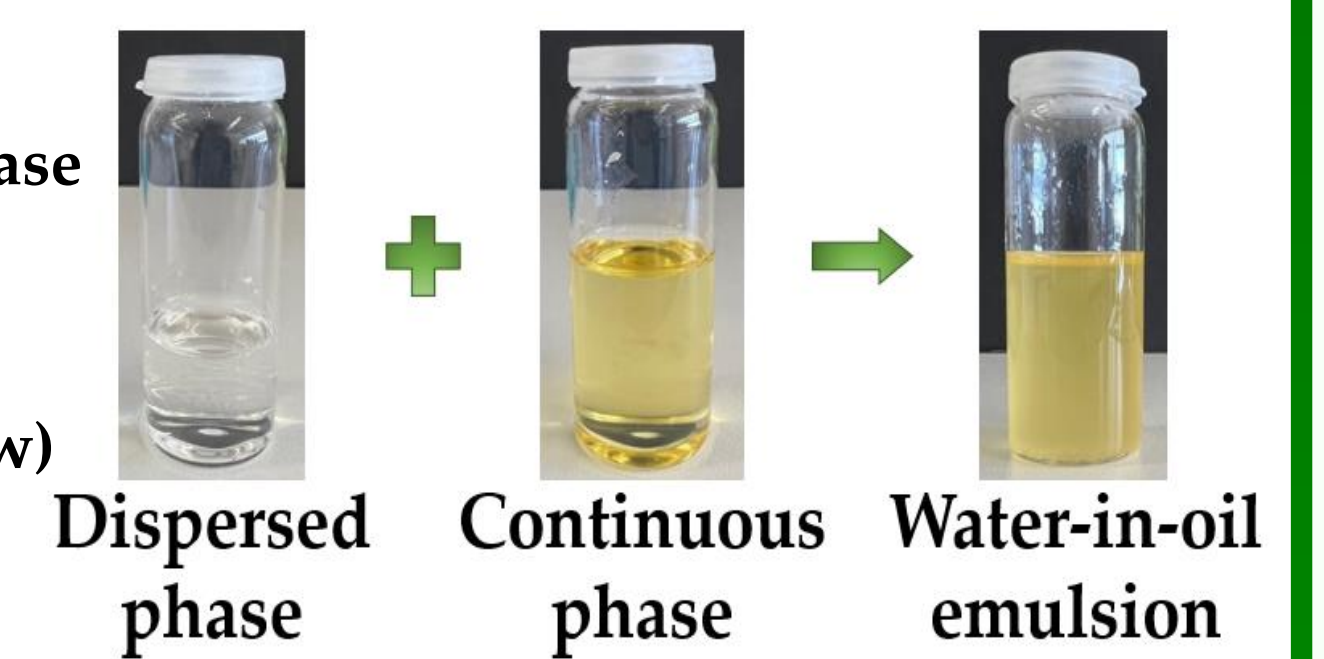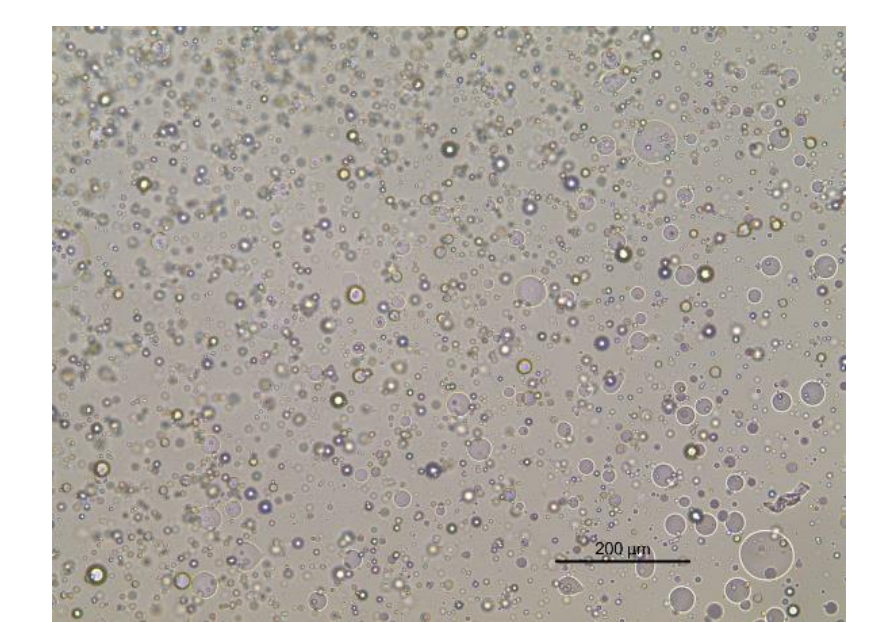

### Contact angle studies

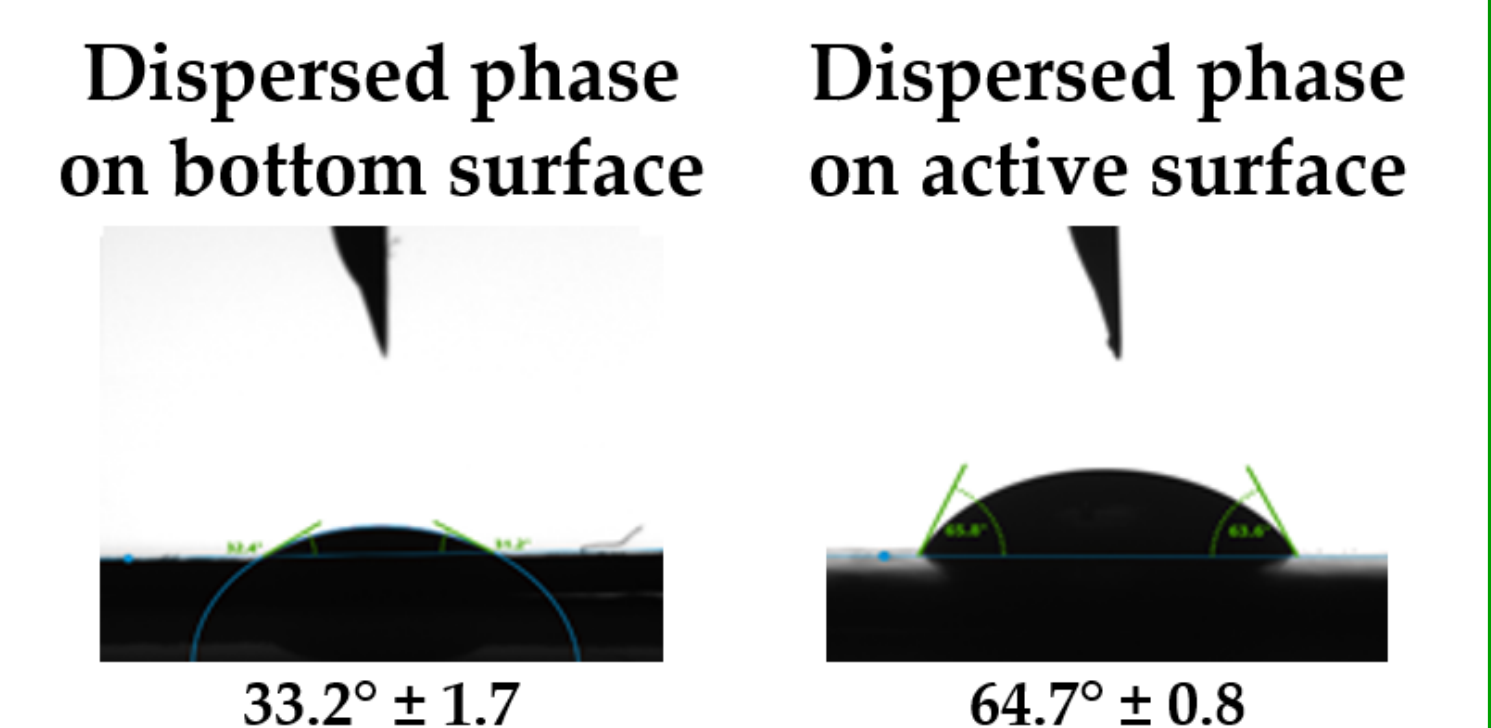

### Interfacial tension studies

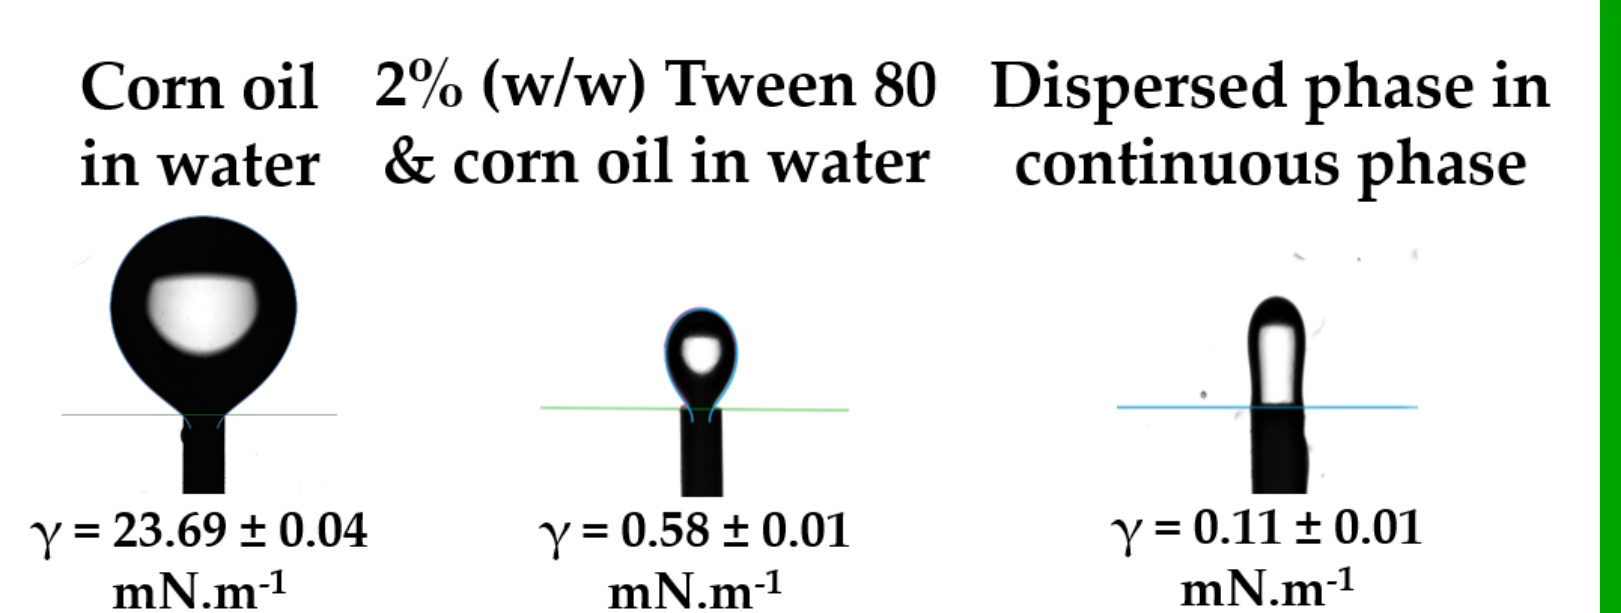

## Motivation

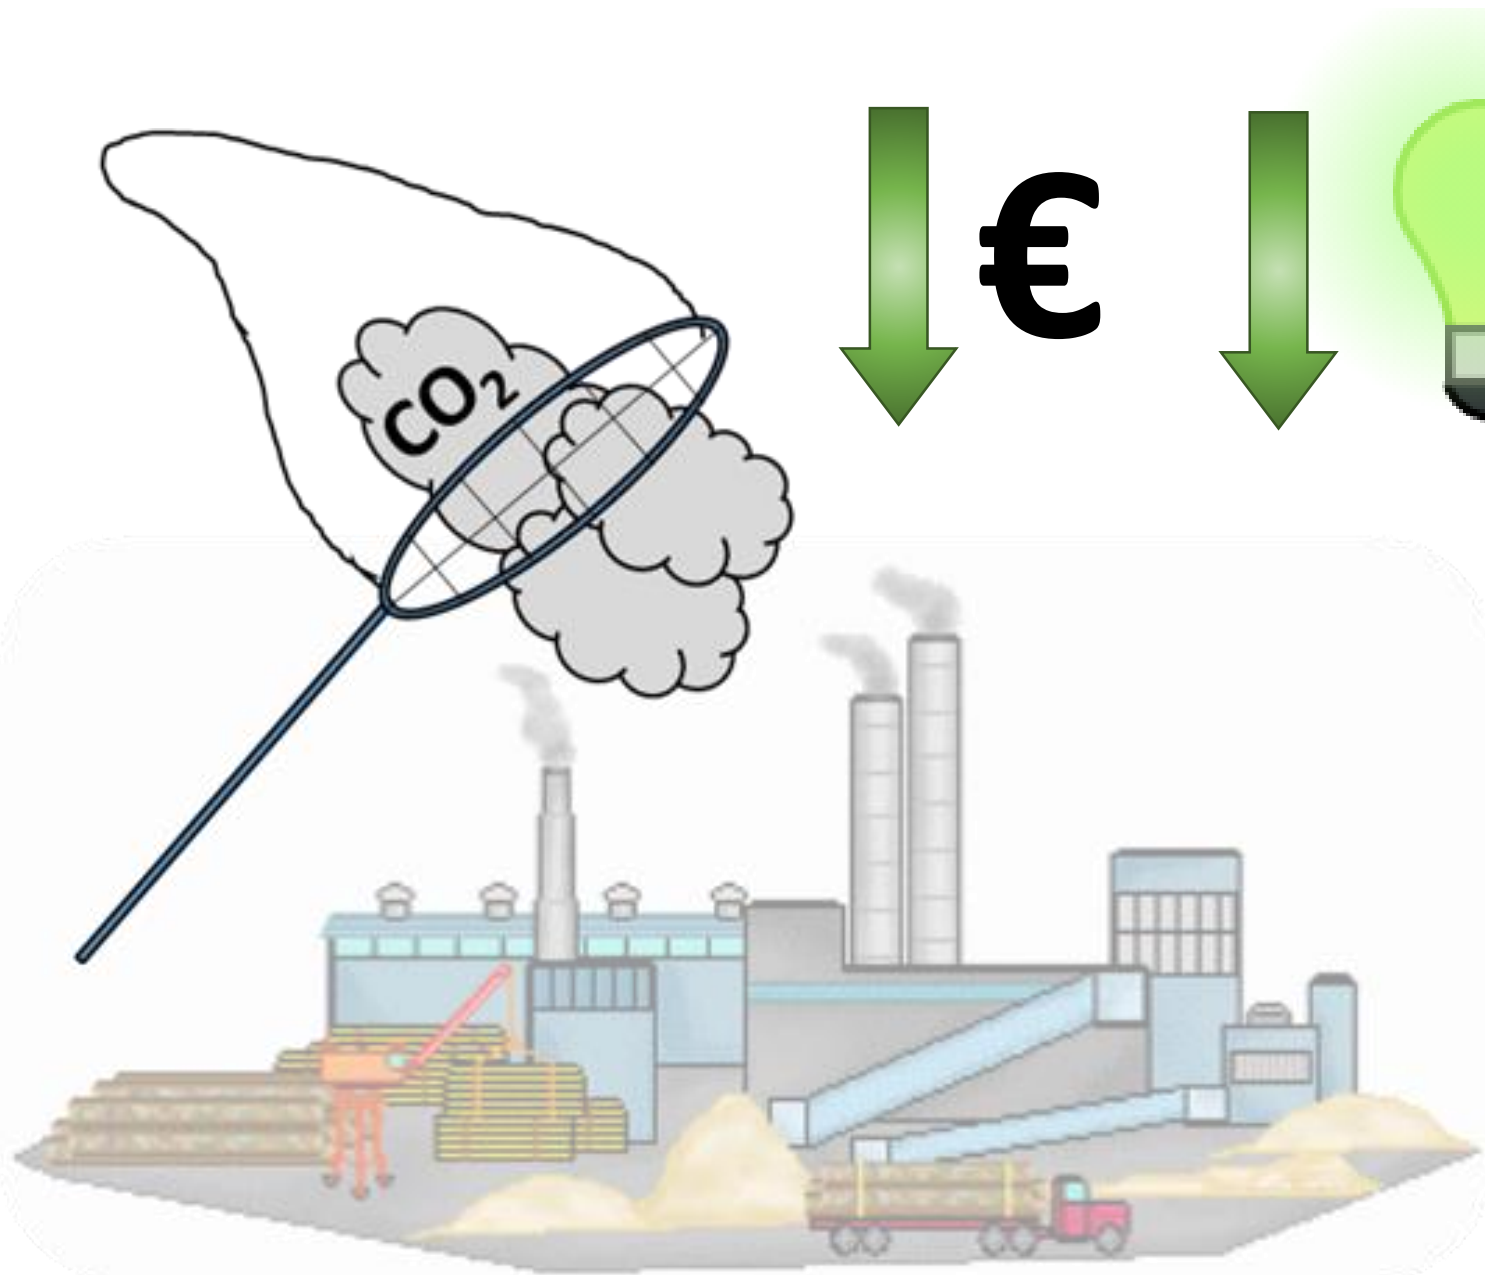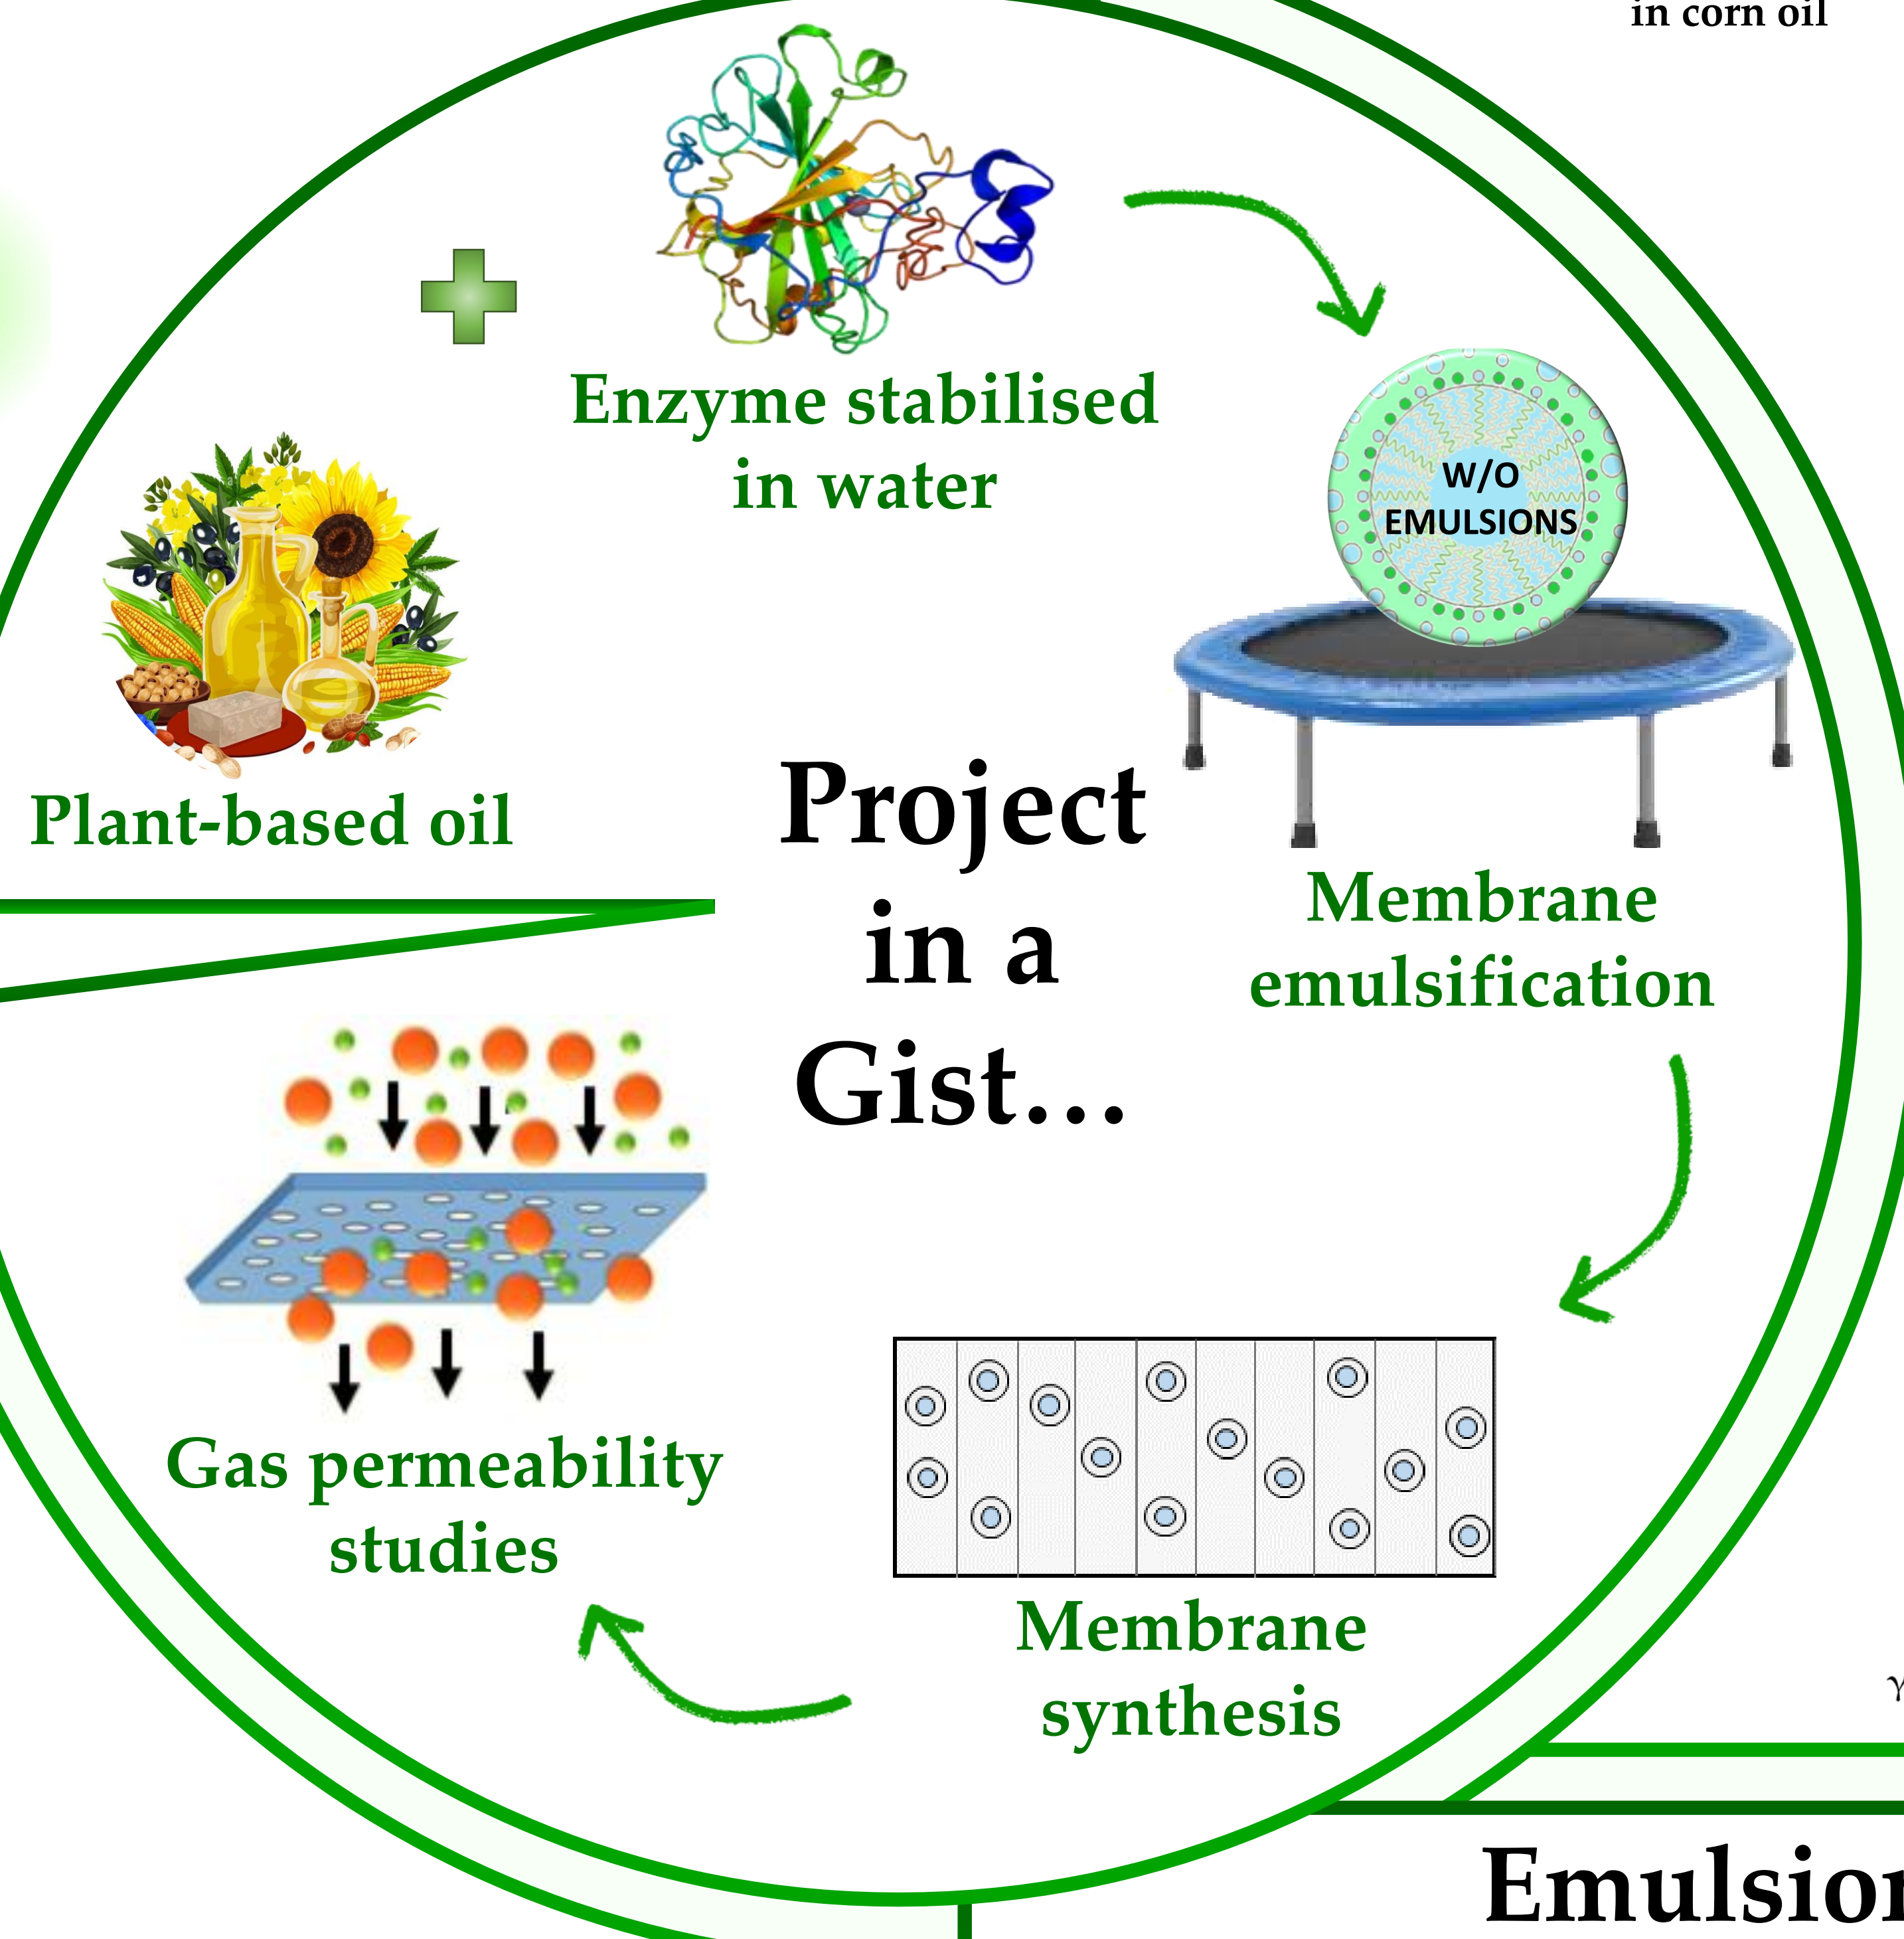

## Gas Permeation

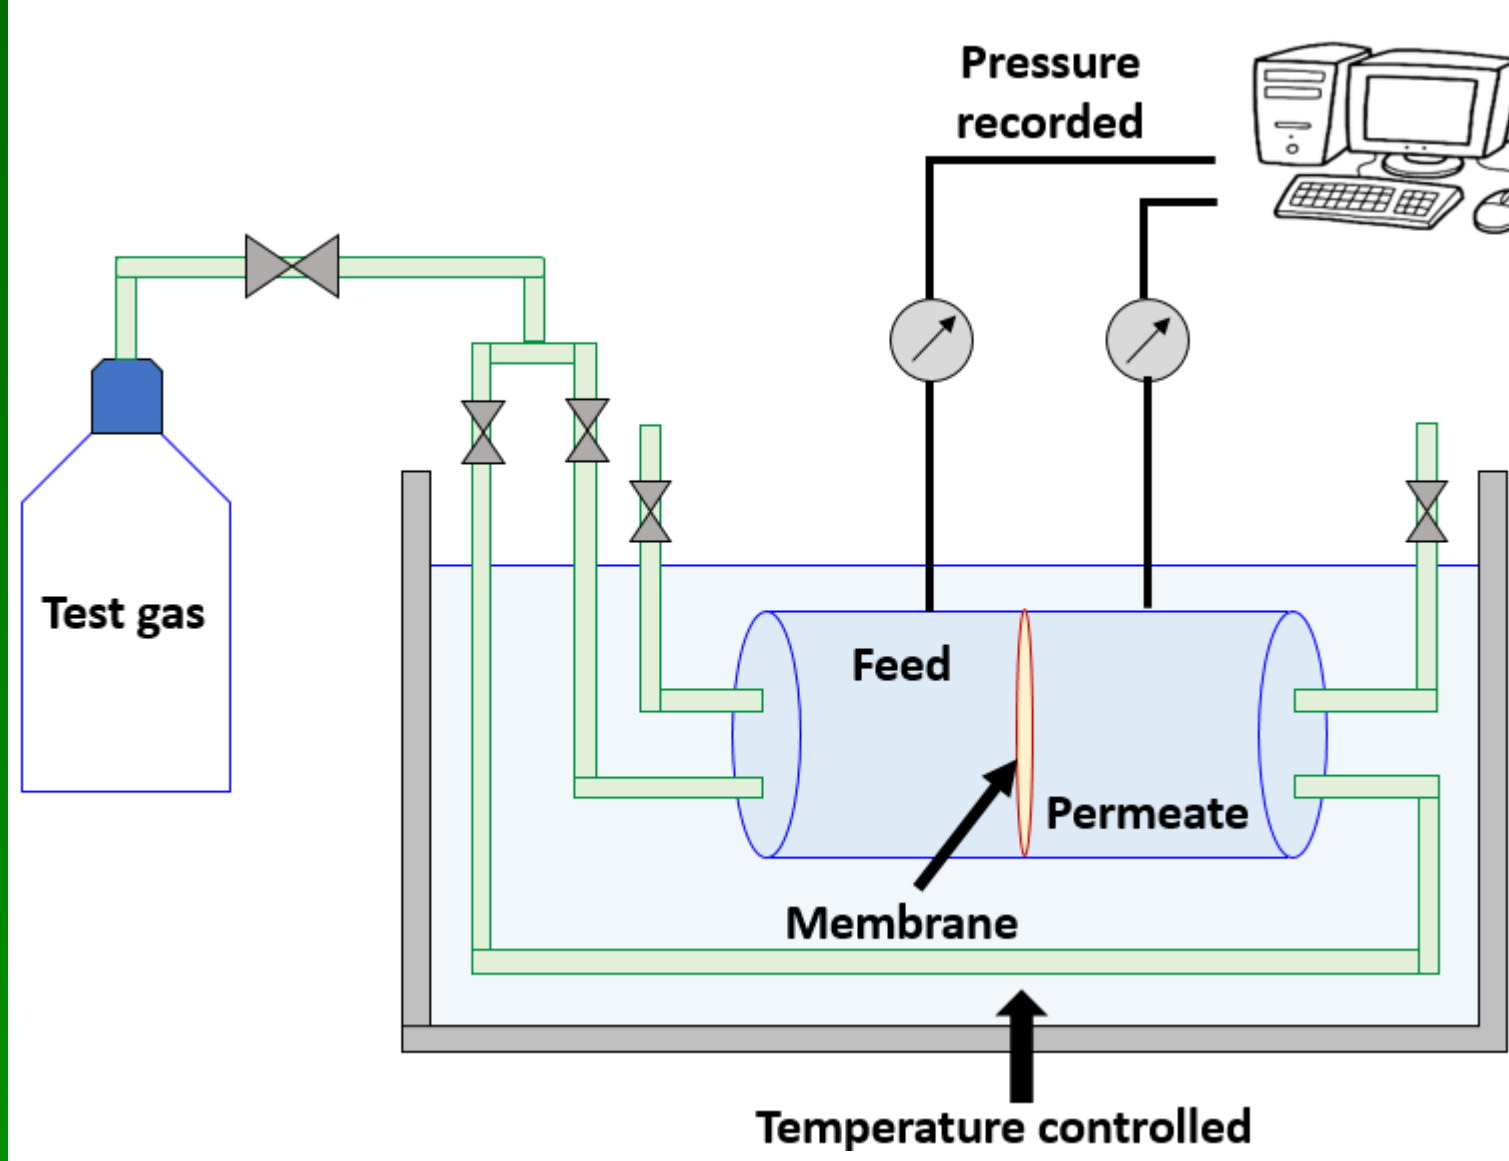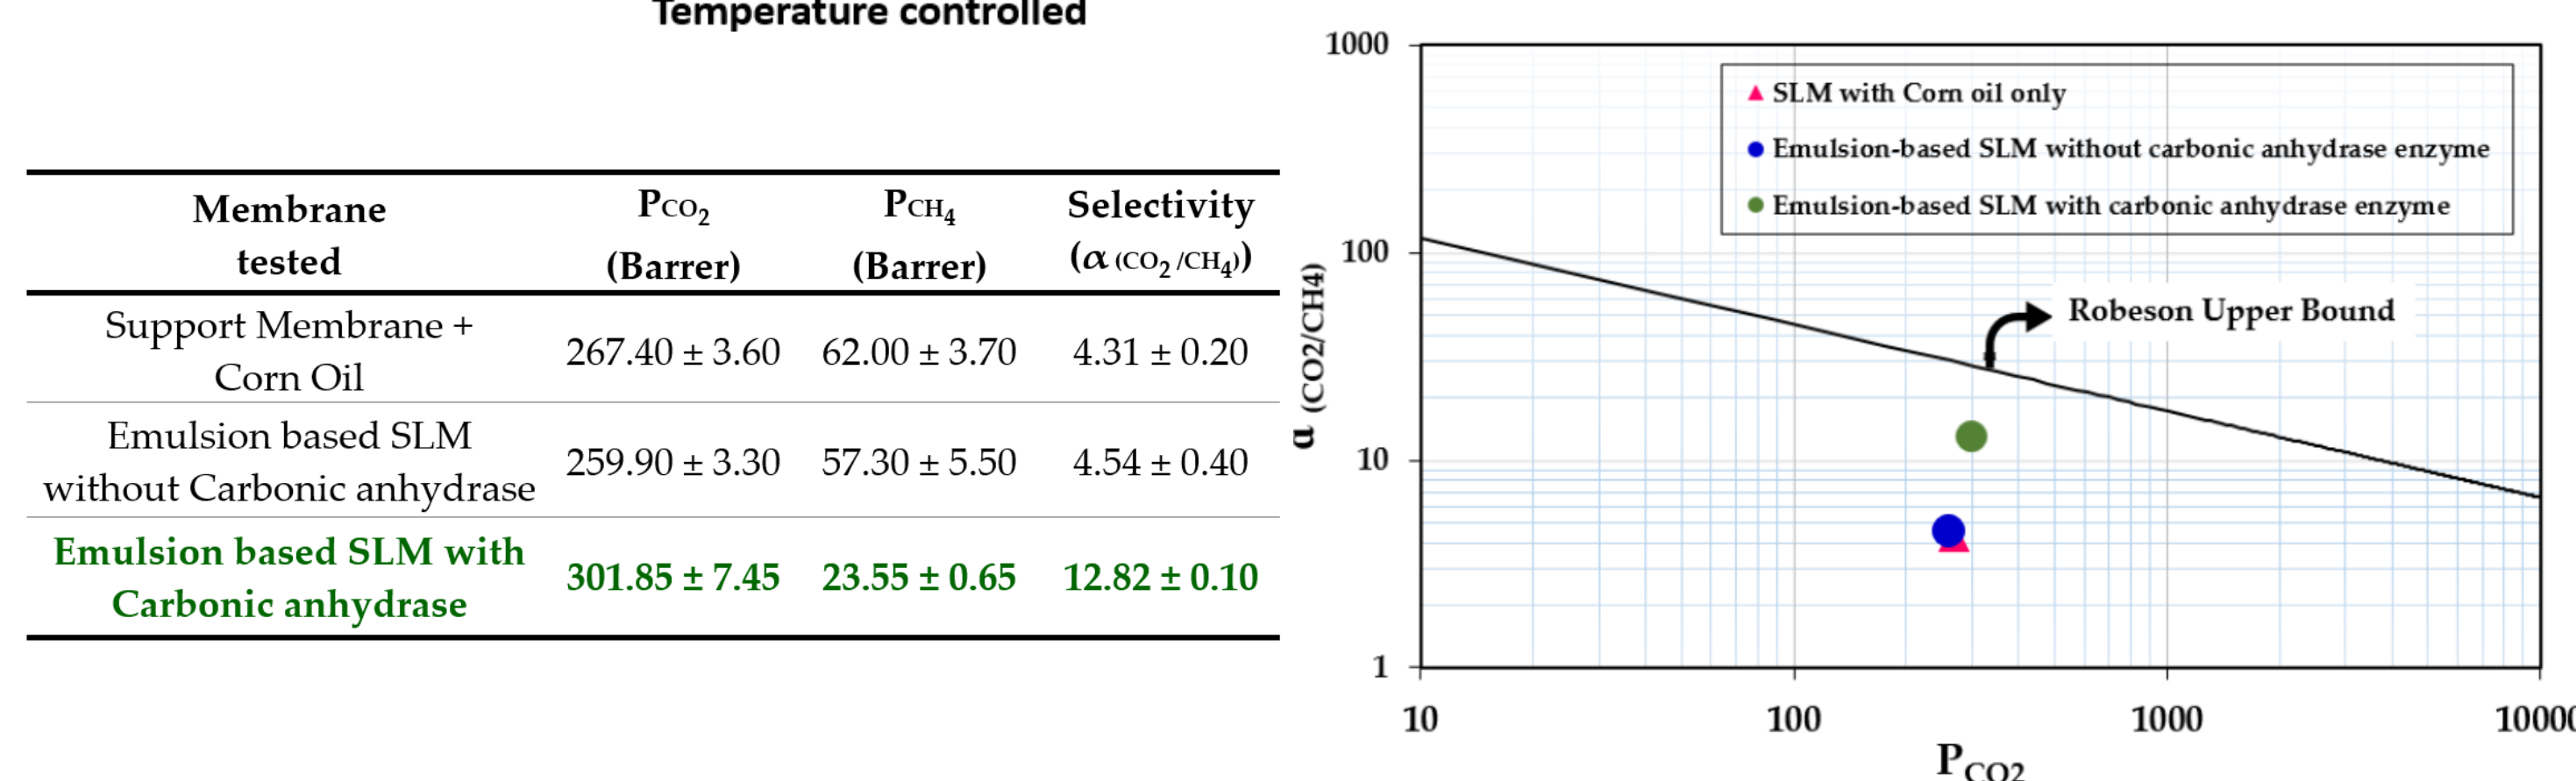

## Emulsion-based SLMs

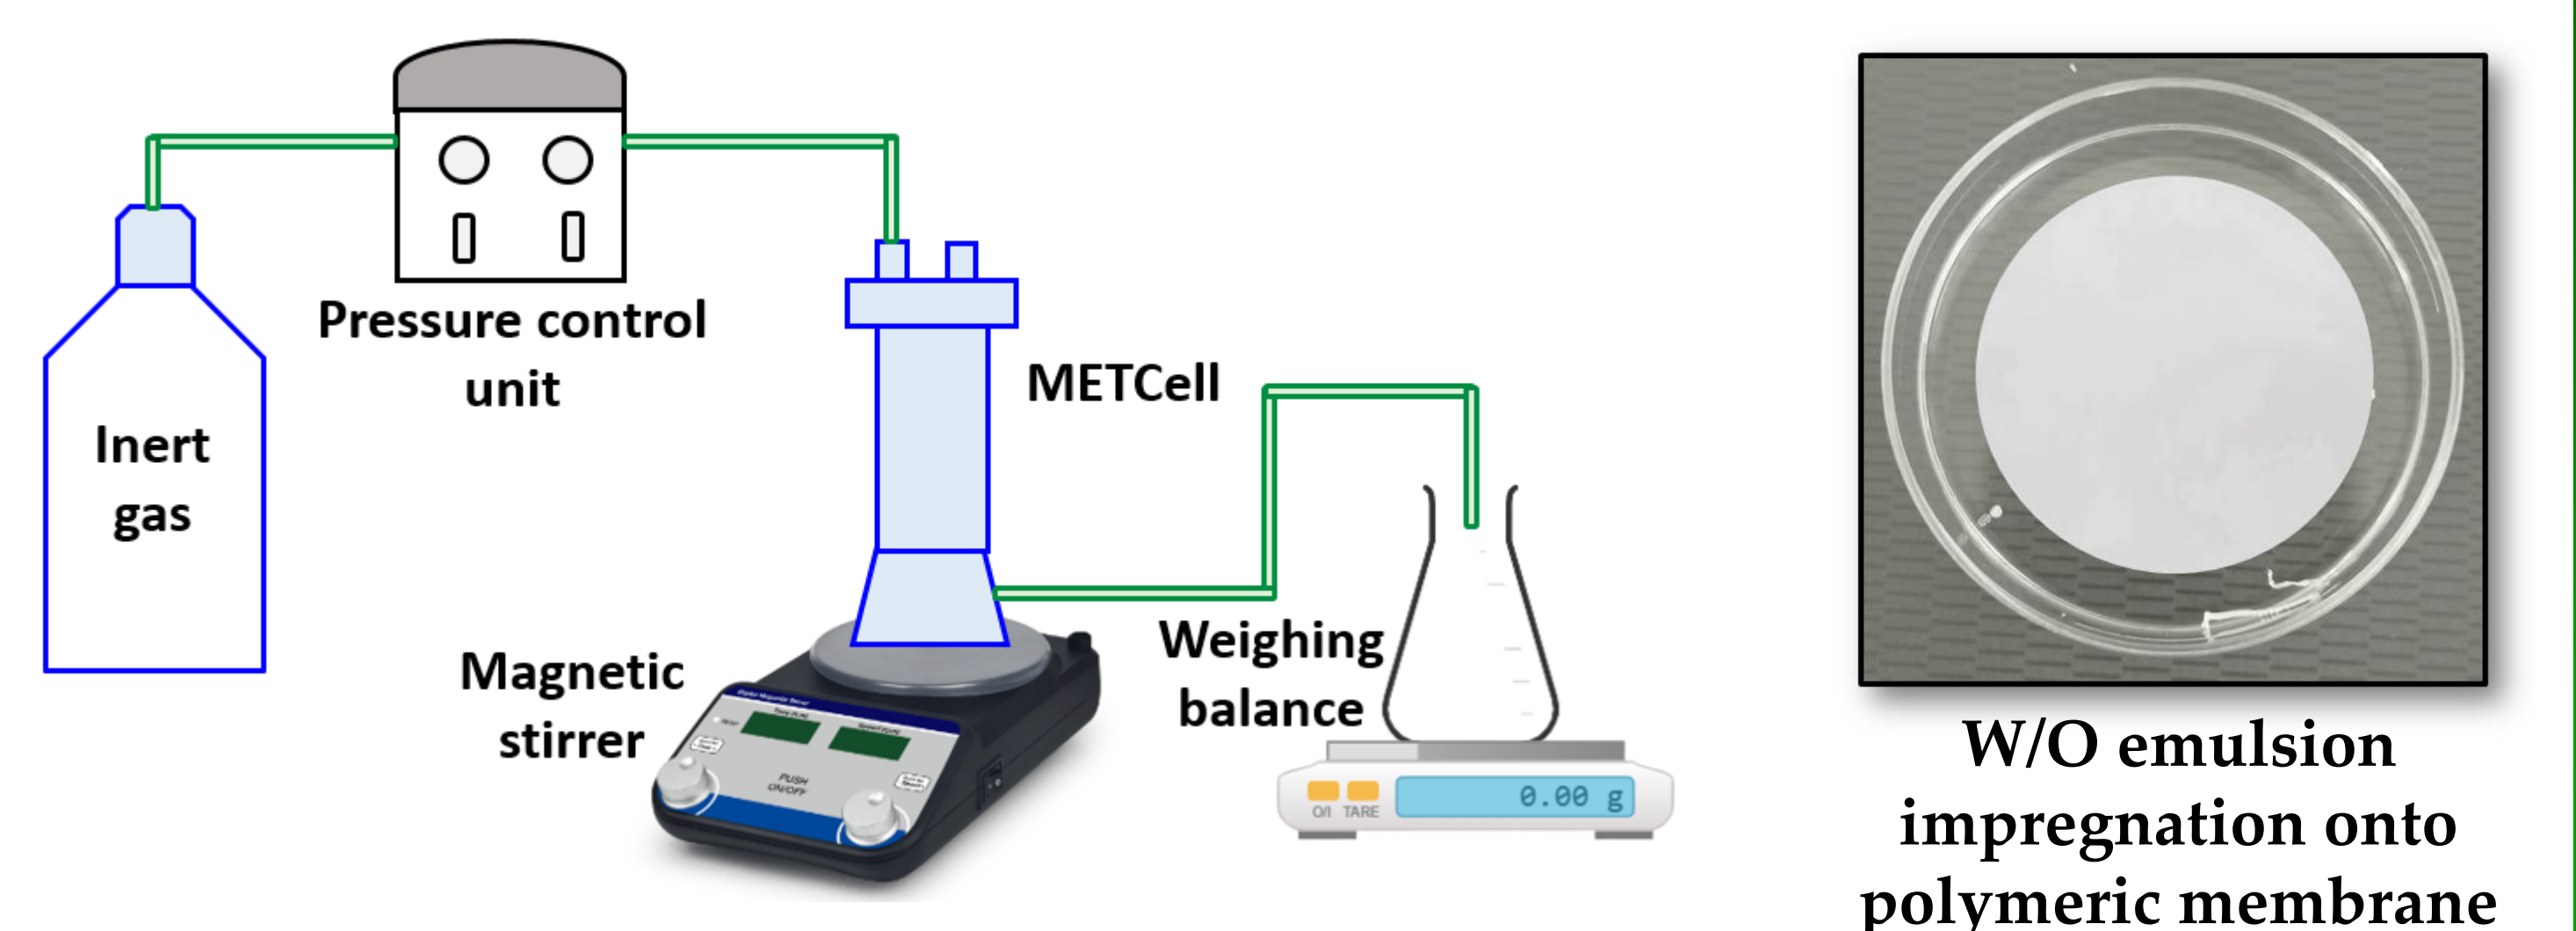

## Outlook and Future Perspectives

- A detailed experimental methodology was incorporated to explore the biogas separation capabilities of a bio-based emulsion system impregnated onto a membrane support.
- More efforts can be channelised for the characterisation of the W/O emulsions produced by energy efficient and mild 'membrane emulsification' technique.
- CO<sub>2</sub> permeability increased by ~15 % and that of CH<sub>4</sub> decreased by ~60 % through the emulsion-based SLM containing carbonic anhydrase when compared to that without it.
- As a *proof-of-concept*, this work portrays the enhanced, synergetic effects of carbonic anhydrase within a bio-based emulsion system for CO<sub>2</sub> capture.

## References

- [1] K. Friess et al., A review on ionic liquid gas separation membranes (2021), *Membranes*, 11 (2), 97.
- [2] G. Genduso and I. Pinna, Quantification of sorption, diffusion, and plasticization properties of cellulose triacetate films under mixed-gas CO<sub>2</sub>/CH<sub>4</sub> environment (2020), *Journal of Membrane Science*, 610, 118269.
- [3] U. T. Syed et al., Greening perfluorocarbon based nanoemulsions by direct membrane emulsification: Comparative studies with ultrasound emulsification (2022), *Journal of Cleaner Production*, 357, 131566.

## Acknowledgements

- Foundation of Science and Technology (FCT), national public agency of Portugal for the doctoral grants SFRH/BD/146967/2019 and 2020.07757.BD.
- EACEA of the European Commission for the Erasmus Mundus Doctorate in Membrane Engineering (EUDIME) scholarship.
- The Associate Laboratory for Green Chemistry - LAQV which is financed by national funds from FCT/MCTES (UIDB/50006/2020).
